# Supplementary material for: Himalayan Horticulture Produce Supply Chain Disruptions and Sustainable Business Solution—A Case Study on Kiwi Fruit in Uttarakhand
Source: MDPI journal article supplement (doi:10.3390/horticulturae8111018), 2022-11-01
Supplement: s1 [file s1]

**Supplementary Support Document: Figure: S1,S2.**

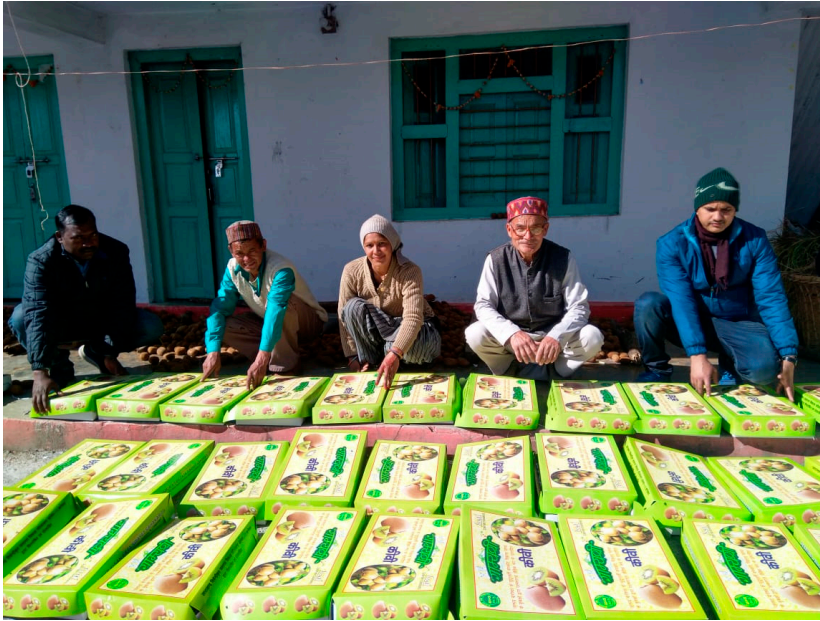

**Figure S1:** Before Intervention: Farmers with old 2ply corrugated box packaging, prone to damages

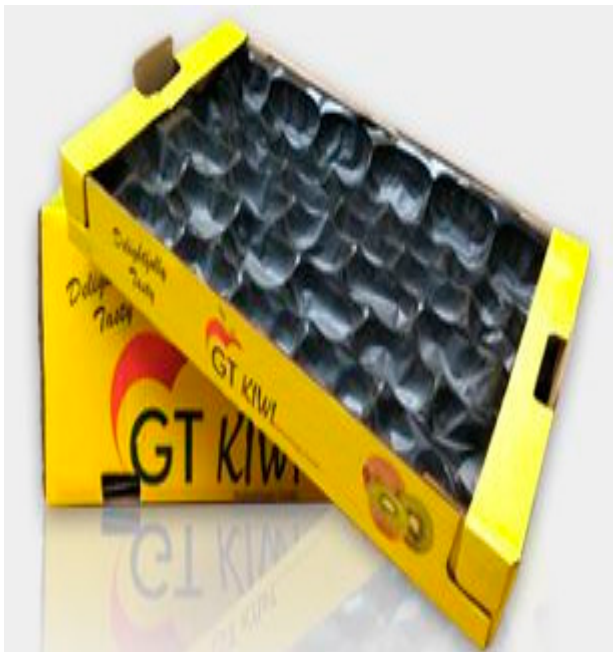

**Figure S2:** After Intervention: New Packaging: 3-4 Ply corrugated boxes with trays, picture taken from interne for reference
