# Supplementary material for: Himalayan Horticulture Produce Supply Chain Disruptions and Sustainable Business Solution—A Case Study on Kiwi Fruit in Uttarakhand
Source: MDPI journal article supplement (doi:10.3390/horticulturae8111018), 2022-11-01
Supplement: s1 [file s1]

Archive with 1 entries (1 files):
- horticulturae-1927954-supplementary.pdf
